# Supplementary material
Source: publisher figshare collection journal article supplement (https://asha.figshare.com/articles/dataset/_/22661689)
Supplement: Supplementary file 2 [file 1]

**Supplemental Material S3.** Validity studies: method, age range and number of participants, and obtained correlations. The table is ordered by the publication's year.

\* Partial correlation. <sup>1</sup> Only significant correlations ( $p < .05$ ) are listed. <sup>2</sup> Yet another age range (WG), inconsistent with the study's description, was given by the authors. <sup>3</sup> No information on the sessions' length and/or location available. <sup>4</sup> Yet another number of participants ( $N = 42$ ), inconsistent with the study's description, was given by the authors. <sup>5</sup> Other tasks measuring active lexicon (verbs and nouns) were used,  $r = 0.71$  (Table 8.3). <sup>6</sup> Because of a long interval between CDIs 'administration (= 6M), we consider correlations to be indicative of predictive validity, and not of long-term reliability, as suggested by the authors.

| Validity studies                                                                         | Method                             | Age range;<br>number of<br>participants | Correlations <sup>1</sup>                                                                                                                                                                                     |
|------------------------------------------------------------------------------------------|------------------------------------|-----------------------------------------|---------------------------------------------------------------------------------------------------------------------------------------------------------------------------------------------------------------|
| <b>1. Criterion-based concurrent validity</b><br><b>1a. Spontaneous language samples</b> |                                    |                                         |                                                                                                                                                                                                               |
| Mexican Spanish: Jackson-Maldonado et al. (1993)                                         | 30-min recorded session in the lab | 15–31M <sup>2</sup> ; 17                | CDI vocabulary and number of different words: 0.84                                                                                                                                                            |
| Icelandic: Thordardottir & Ellis Weismer (1996, Table 4)                                 | recorded session <sup>3</sup>      | 15–36M; 18                              | CDI vocabulary and type-token ratio: 0.71<br>CDI vocabulary and total number of words: 0.91<br>CDI vocabulary and MLU: 0.89<br>CDI Complexity and MLU: 0.86<br>CDI Complexity and total number of words: 0.82 |
| Mexican Spanish: Jackson-Maldonado et al. (2003)                                         | recorded session <sup>3</sup>      | 12M; 15                                 | CDI vocabulary and number of different words: 0.61<br>CDI gestures and communicative gestures: 0.47                                                                                                           |
|                                                                                          | 35-min recorded session            | 20M; 20                                 | CDI vocabulary and number of different words: 0.66                                                                                                                                                            |
|                                                                                          |                                    | 28M; 19                                 | CDI vocabulary and number of different words: 0.56                                                                                                                                                            |

| Validity studies                                   | Method                                                      | Age range;<br>number of<br>participants | Correlations <sup>1</sup>                                                                                                                                      |
|----------------------------------------------------|-------------------------------------------------------------|-----------------------------------------|----------------------------------------------------------------------------------------------------------------------------------------------------------------|
| Peninsular Spanish:<br>López Ornat et al. (2005)   | 45-min recorded sessions at home                            | 17–28M; 32                              | CDI Complexity and spontaneous grammar structures (i.e., morphological forms): 0.87                                                                            |
| Basque: García et al. (2008)                       | 45-min recorded sessions in the lab                         | 16–30M; 17                              | CDI vocabulary and number of different words: 0.76<br>CDI M3L and MLU: 0.54                                                                                    |
| Canadian French: Trudeau et al. (2008, Table 4)    | 20-min recorded session in the lab                          | 19–21M; 25                              | CDI vocabulary and number of transcribed words: 0.61<br>CDI vocabulary and MLU: 0.72<br>CDI M3L and MLU: 0.79<br>CDI M3L and number of transcribed words: 0.76 |
|                                                    |                                                             | 26–28M; 23                              | CDI vocabulary and number of transcribed words: 0.57<br>CDI vocabulary and MLU: 0.68<br>CDI M3L and MLU: 0.74<br>CDI M3L and number of transcribed words: 0.74 |
| German: Szagun et al. (2009, Table 11)             | 2-hour recorded session                                     | WS; 59                                  | CDI vocabulary and number of type words: 0.83*<br>CDI Complexity and MLU: 0.82*<br>CDI Morphology and MLU: 0.85*                                               |
| Irish: O’Toole & Fletcher (2010, Table 3, Table 4) | 15 min recorded session at home                             | 16–40M; 21                              | CDI vocabulary and number of different words: 0.66*<br>CDI vocabulary and type-token ratio: 0.45*<br>CDI Complexity and MLU: 0.46*<br>CDI M3L and MLU: 0.53*   |
| Slovak: Kapalková et al. (2010)                    | 1-hour recorded session at home (mixed with Lahey’s method) | 8–16M; 16                               | CDI vocabulary and total number of words: 0.70<br>semantic categories: 0.78<br>gestures: 0.55                                                                  |

| Validity studies                                                    | Method                              | Age range;<br>number of<br>participants | Correlations <sup>1</sup>                                                                                                                                           |
|---------------------------------------------------------------------|-------------------------------------|-----------------------------------------|---------------------------------------------------------------------------------------------------------------------------------------------------------------------|
|                                                                     |                                     |                                         | total scores agreement: 82.5 %                                                                                                                                      |
| Galician: Pérez Pereira & Resches (2011, Table 3)                   | 30-min recorded session at home     | 18M; 42                                 | CDI vocabulary and lexical diversity: 0.86<br>CDI M3L and MLU: 0.53<br>CDI vocabulary and MLU: 0.38<br>CDI M3L and lexical diversity: 0.47<br>CDI M3L and MLU: 0.53 |
|                                                                     |                                     | 24M; 42                                 | CDI vocabulary and lexical diversity: 0.80,<br>CDI vocabulary and MLU: 0.73,<br>CDI M3L and lexical diversity: 0.74<br>CDI M3L and MLU: 0.73                        |
| Kenyan: Alcock et al. (2015)                                        | 30–60-min recorded sessions at home | 20–28M; 10                              | CDI vocabulary and type-token ratio: 0.54<br>CDI grammar scores and type-token ratio: 0.60                                                                          |
| <b>1b. Standardized tests</b>                                       |                                     |                                         |                                                                                                                                                                     |
| Icelandic: Thordardottir & Ellis Weismer (1996, Table 4)            | EOWPVT                              | 15–36M; 18                              | CDI vocabulary and EOW: 0.84<br>CDI Complexity and EOW: 0.81                                                                                                        |
| Cantonese: Tardif & Fletcher (2008, Table 4.8c & 4.8d) <sup>4</sup> | Reynell                             | 11,12 or 15M; 42                        | CDI vocabulary and Reynell expressive: 0.57*<br>CDI gestures and Reynell expressive: 0.35*                                                                          |
|                                                                     |                                     | 18, 24, or 30M; 57                      | CDI vocabulary and Reynell receptive: 0.47*<br>CDI vocabulary and Reynell expressive: 0.60*<br>CDI Complexity and Reynell receptive: 0.46*                          |

| Validity studies                                      | Method                                                   | Age range;<br>number of<br>participants | Correlations <sup>1</sup>                                                                                                                                                          |
|-------------------------------------------------------|----------------------------------------------------------|-----------------------------------------|------------------------------------------------------------------------------------------------------------------------------------------------------------------------------------|
|                                                       |                                                          |                                         | CDI Complexity and Reynell expressive: 0.56*                                                                                                                                       |
| Mandarin: Tardif & Fletcher (2008, Table 4.8a & 4.8b) | Gesell                                                   | 12M; 36                                 | CDI vocabulary and Gesell verbal: 0.55<br>CDI gestures and Gesell verbal: 0.30                                                                                                     |
|                                                       |                                                          | 18, 24, or 30M; 60                      | CDI vocabulary and Gesell verbal: 0.76*<br>CDI vocabulary and Gesell performance: 0.51*<br>CDI Complexity and Gesell verbal: 0.78*<br>CDI Complexity and Gesell performance: 0.50* |
| Canadian French: Trudeau et al. (2008)                | PLS as a pre-screening test                              | 8–10M, 13–15M, 19–21M, 26–28M; 121      | x                                                                                                                                                                                  |
| Basque: García et al. (2008)                          | Inventario de Desarrollo Battelle                        | 8–15M; 11                               | CDI vocabulary and IDB vocabulary: 0.917                                                                                                                                           |
|                                                       |                                                          | 16–30M; 9                               | CDI vocabulary and IDB vocabulary: 0.81                                                                                                                                            |
| Polish: Smoczyńska et al. (2015)                      | OTSR = Obrazkowy Test Słownikowy Rozumienie <sup>5</sup> | 24–36M; 145                             | CDI vocabulary and OTSR: 0.41–0.44                                                                                                                                                 |
| British: Alcock et al. (2020)                         | PLS 5 <sup>th</sup> UK Edition                           | 16–18M; 32                              | CDI comprehension and PLS comprehension score: 0.413,<br>CDI vocabulary and PLS expressive score: 0.391                                                                            |
| <b>1c. Own experimental methods</b>                   |                                                          |                                         |                                                                                                                                                                                    |

| Validity studies                                 | Method                 | Age range;<br>number of<br>participants | Correlations <sup>1</sup>                                                                                                |
|--------------------------------------------------|------------------------|-----------------------------------------|--------------------------------------------------------------------------------------------------------------------------|
| Swedish: Eriksson (2001, Table 4)                | producing a narrative  | 36 or 42M; 27                           | CDI M3L and MLU: 0.54<br>CDI M3L and number of word types: 0.70                                                          |
| Mexican Spanish: Jackson-Maldonado et al. (2003) | object-naming task     | 20M; 20                                 | CDI vocabulary and production score from object naming task: 0.69                                                        |
|                                                  |                        | 28M; 19                                 | CDI vocabulary and production score from object naming task: 0.68                                                        |
| Kenyan: Alcock et al. (2015)                     | object-naming task     | 9–15M; 19                               | None of the children named a object or toy                                                                               |
|                                                  | gesture challenge task |                                         | CDI gesture score and gesture score from the task: 0.63<br>CDI comprehension score and gesture score from the task: 0.61 |
|                                                  | object-selection task  | 12–15M; 20                              | CDI comprehension and comprehension score from the task: 0.45                                                            |
|                                                  | PVT                    | 24–30M; 23                              | CDI vocabulary and picture naming task: 0.52                                                                             |
| Faroese: Rasmussen & Bleses (2018)               | picture naming task    | 30–36M; 12                              | 70% of agreement between CDI vocabulary and picture naming task                                                          |
| British: Alcock et al. (2020)                    | object selection task  | 16–18M; 32                              | CDI comprehension and object selection task: 0.413<br>CDI vocabulary and object selection task: 0.43                     |
|                                                  | gesture challenge task | 16–18M; 32                              | CDI gestures and gesture score: 0.34                                                                                     |

| Validity studies                                               | Method                                       | Age range;<br>number of<br>participants                                 | Correlations <sup>1</sup>                                                                                                                                                                                                                                                                  |
|----------------------------------------------------------------|----------------------------------------------|-------------------------------------------------------------------------|--------------------------------------------------------------------------------------------------------------------------------------------------------------------------------------------------------------------------------------------------------------------------------------------|
| <b>2. Predictive validity</b><br><b>2a. Comparing the CDIs</b> |                                              |                                                                         |                                                                                                                                                                                                                                                                                            |
| Finnish: Lyytinen et al. (1996, Table 3)                       | interval between CDIs: 4 months              | 1 <sup>st</sup> CDI at 14M; 94                                          | 1 <sup>st</sup> CDI and 2 <sup>nd</sup> vocabulary: 0.76                                                                                                                                                                                                                                   |
| New Zealand English: Reese & Read (2000, Table 1)              | interval between CDIs: 6 months <sup>6</sup> | 1 <sup>st</sup> CDI at 19M; 59                                          | 1 <sup>st</sup> CDI and 2 <sup>nd</sup> Complexity: 0.73<br>1 <sup>st</sup> CDI and 2 <sup>nd</sup> M3L: 0.76                                                                                                                                                                              |
| Swedish: Eriksson (2001, Table 6)                              | interval between CDIs: 14 months             | 1 <sup>st</sup> CDI at 22 or 28M + 2 <sup>nd</sup> CDI at 36 or 42M; 27 | 1 <sup>st</sup> CDI vocabulary and 2 <sup>nd</sup> CDI grammar score: 0.41<br>1 <sup>st</sup> CDI M3L and 2 <sup>nd</sup> CDI grammar score: 0.48<br>1 <sup>st</sup> CDI M3L and 2 <sup>nd</sup> CDI MLU: 0.56<br>1 <sup>st</sup> CDI grammar and 2 <sup>nd</sup> CDI grammar scores: 0.49 |
| Peninsular Spanish: López Ornat et al. (2005)                  | interval between CDIs: 2–5 months            | WG + WS; 19<br>WG + WG; 9<br>WS + WS; 6                                 | 1 <sup>st</sup> CDI and 2 <sup>nd</sup> CDI comprehension: 0.96<br>1 <sup>st</sup> CDI and 2 <sup>nd</sup> CDI vocabulary: > 0.80                                                                                                                                                          |
| Croatian: Kovacevic et al. (2007)                              | interval between CDIs: 6 months              | 1 <sup>st</sup> CDI at 8–10M + 2 <sup>nd</sup> CDI 14–17M; 47           | 1 <sup>st</sup> CDI and 2 <sup>nd</sup> CDI vocabulary: 0.38*<br>1 <sup>st</sup> CDI and 2 <sup>nd</sup> CDI comprehension: 0.44*<br>1 <sup>st</sup> CDI and 2 <sup>nd</sup> CDI gestures: 0.44*                                                                                           |
|                                                                |                                              | 1 <sup>st</sup> CDI at 10–16M + 2 <sup>nd</sup> CDI 16–25; 217          | 1 <sup>st</sup> CDI and 2 <sup>nd</sup> CDI vocabulary: 0.69*                                                                                                                                                                                                                              |
|                                                                |                                              | 1 <sup>st</sup> CDI at 16–24M + 2 <sup>nd</sup> CDI                     | 1 <sup>st</sup> CDI and 2 <sup>nd</sup> total scores: 0.71*<br>1 <sup>st</sup> CDI and 2 <sup>nd</sup> CDI Complexity: 0.62*                                                                                                                                                               |

| Validity studies                       | Method                          | Age range;<br>number of<br>participants | Correlations <sup>1</sup>                                                                                                                                                                                                                                                                                                                                                                                                                                                                                                                                                                                                                                                            |
|----------------------------------------|---------------------------------|-----------------------------------------|--------------------------------------------------------------------------------------------------------------------------------------------------------------------------------------------------------------------------------------------------------------------------------------------------------------------------------------------------------------------------------------------------------------------------------------------------------------------------------------------------------------------------------------------------------------------------------------------------------------------------------------------------------------------------------------|
|                                        |                                 | 22–30M; 228                             |                                                                                                                                                                                                                                                                                                                                                                                                                                                                                                                                                                                                                                                                                      |
| Canadian French: Trudeau et al. (2008) | interval between CDIs: 6 months | 1 <sup>st</sup> CDI at 8–10M; 20        | 1 <sup>st</sup> and 2 <sup>nd</sup> CDI comprehension: 0.57                                                                                                                                                                                                                                                                                                                                                                                                                                                                                                                                                                                                                          |
|                                        |                                 | 1 <sup>st</sup> CDI at 13–15M; 31       | 1 <sup>st</sup> and 2 <sup>nd</sup> CDI vocabulary: 0.65<br>1 <sup>st</sup> CDI vocabulary and 2 <sup>nd</sup> CDI grammar morphemes: 0.52<br>1 <sup>st</sup> CDI gesture and 2 <sup>nd</sup> CDI vocabulary: 0.43<br>1 <sup>st</sup> CDI gesture and 2 <sup>nd</sup> CDI grammar morphemes: 0.47                                                                                                                                                                                                                                                                                                                                                                                    |
|                                        |                                 | 1 <sup>st</sup> CDI at 19–21M; 28       | 1 <sup>st</sup> and 2 <sup>nd</sup> CDI vocabulary: 0.82<br>1 <sup>st</sup> CDI vocabulary and 2 <sup>nd</sup> CDI Complexity: 0.78<br>1 <sup>st</sup> CDI vocabulary and 2 <sup>nd</sup> CDI grammar morphemes: 0.7<br>1 <sup>st</sup> CDI Complexity and 2 <sup>nd</sup> CDI vocabulary: 0.59<br>1 <sup>st</sup> CDI Complexity and 2 <sup>nd</sup> CDI grammar morphemes: 0.66<br>1 <sup>st</sup> and 2 <sup>nd</sup> CDI Complexity: 0.63<br>1 <sup>st</sup> and 2 <sup>nd</sup> CDI grammar morphemes: 0.74<br>1 <sup>st</sup> CDI grammar morphemes and 2 <sup>nd</sup> CDI vocabulary: 0.78<br>1 <sup>st</sup> CDI grammar morphemes and 2 <sup>nd</sup> CDI Complexity: 0.78 |
|                                        |                                 | 1 <sup>st</sup> CDI at 26–28M; 27       | 1 <sup>st</sup> and 2 <sup>nd</sup> CDI vocabulary: 0.84<br>1 <sup>st</sup> CDI vocabulary and 2 <sup>nd</sup> CDI Complexity: 0.78<br>1 <sup>st</sup> CDI vocabulary and 2 <sup>nd</sup> CDI grammar morphemes: 0.73<br>1 <sup>st</sup> CDI Complexity and 2 <sup>nd</sup> CDI vocabulary: 0.65<br>1 <sup>st</sup> CDI Complexity and 2 <sup>nd</sup> CDI grammar morphemes: 0.61<br>1 <sup>st</sup> and 2 <sup>nd</sup> CDI Complexity: 0.59                                                                                                                                                                                                                                       |

| Validity studies                                   | Method                            | Age range;<br>number of<br>participants                            | Correlations <sup>1</sup>                                                                                                                                                                                                           |
|----------------------------------------------------|-----------------------------------|--------------------------------------------------------------------|-------------------------------------------------------------------------------------------------------------------------------------------------------------------------------------------------------------------------------------|
|                                                    |                                   |                                                                    | 1 <sup>st</sup> and 2 <sup>nd</sup> CDI grammar morphemes: 0.74<br>1 <sup>st</sup> CDI grammar morphemes and 2 <sup>nd</sup> CDI vocabulary: 0.58<br>1 <sup>st</sup> CDI grammar morphemes and 2 <sup>nd</sup> CDI Complexity: 0.60 |
| Basque: García et al. (2008)                       | interval between CDIs: 6 months   | 1 <sup>st</sup> CDI at 8–15M; 31                                   | 1 <sup>st</sup> and 2 <sup>nd</sup> CDI comprehension: 0.61<br>1 <sup>st</sup> and 2 <sup>nd</sup> CDI vocabulary: 0.45                                                                                                             |
|                                                    |                                   | 1 <sup>st</sup> CDI at 16–24M; 29                                  | 1 <sup>st</sup> and 2 <sup>nd</sup> CDI vocabulary: 0.84<br>1 <sup>st</sup> and 2 <sup>nd</sup> CDI Complexity: 0.54                                                                                                                |
| German: Szagun et al. (2009, Table 12)             | interval between CDIs: 4–7 months | 1 <sup>st</sup> CDI at 18–24M; 56                                  | 1 <sup>st</sup> and 2 <sup>nd</sup> CDI vocabulary: 0.64*<br>1 <sup>st</sup> and 2 <sup>nd</sup> CDI Complexity: 0.58*<br>1 <sup>st</sup> and 2 <sup>nd</sup> CDI grammar morphemes: 0.61*                                          |
| Irish: O’Toole & Fletcher (2010, Table 5, Table 6) | interval between CDIs: 6 months   | 1 <sup>st</sup> CDI at 16–21M and 2 <sup>nd</sup> CDI at 22–27M; 9 | 1 <sup>st</sup> and 2 <sup>nd</sup> CDI vocabulary: 0.83<br>1 <sup>st</sup> and 2 <sup>nd</sup> CDI Complexity: 0.77<br>1 <sup>st</sup> and 2 <sup>nd</sup> CDI M3L: 0.68                                                           |
|                                                    |                                   | 2 <sup>nd</sup> CDI at 22–27M and 3 <sup>rd</sup> CDI at 28–33; 7  | 2 <sup>nd</sup> and 3 <sup>rd</sup> CDI vocabulary: 0.96<br>2 <sup>nd</sup> and 3 <sup>rd</sup> CDI Complexity: 0.85                                                                                                                |
| Slovak: Kapalková et al. (2010)                    | interval between CDIs: 6 months   | 1 <sup>st</sup> CDI at 8–10M; 62                                   | 1 <sup>st</sup> CDI and 2 <sup>nd</sup> CDI vocabulary: 0.38<br>1 <sup>st</sup> CDI and 2 <sup>nd</sup> CDI comprehension: 0.44<br>1 <sup>st</sup> CDI and 2 <sup>nd</sup> CDI gestures: 0.44                                       |
|                                                    |                                   | 1 <sup>st</sup> CDI at 16–24M; 228                                 | 1 <sup>st</sup> CDI and 2 <sup>nd</sup> CDI vocabulary: 0.71<br>1 <sup>st</sup> CDI and 2 <sup>nd</sup> CDI comprehension: 0.71                                                                                                     |



| Validity studies                               | Method                                       | Age range; number of participants  | Correlations <sup>1</sup>                                                                                                                                                                     |
|------------------------------------------------|----------------------------------------------|------------------------------------|-----------------------------------------------------------------------------------------------------------------------------------------------------------------------------------------------|
|                                                |                                              | 1 <sup>st</sup> CDI at 10–16M; 217 | 1 <sup>st</sup> CDI and 2 <sup>nd</sup> CDI vocabulary: 0.69                                                                                                                                  |
|                                                | interval between CDIs: 10–12 months          | 1 <sup>st</sup> CDI at 9–13M; 24   | 1 <sup>st</sup> CDI and 2 <sup>nd</sup> CDI vocabulary: 0.58<br>1 <sup>st</sup> CDI and 2 <sup>nd</sup> CDI comprehension: 0.51                                                               |
|                                                |                                              | 1 <sup>st</sup> CDI at 14–16M; 38  | 1 <sup>st</sup> CDI and 2 <sup>nd</sup> CDI vocabulary: 0.59<br>1 <sup>st</sup> CDI and 2 <sup>nd</sup> CDI comprehension: 0.48                                                               |
| Galician: Pérez Pereira & Resches (2011)       | interval between CDIs: 6 months              | 1 <sup>st</sup> CDI at 18M; 42     | N/A                                                                                                                                                                                           |
| Polish: Smoczyńska et al. (2015)               | interval between CDIs: max. 135 days         | WG; 20                             | 1 <sup>st</sup> CDI and 2 <sup>nd</sup> CDI comprehension: 0.68<br>1 <sup>st</sup> CDI and 2 <sup>nd</sup> CDI vocabulary: 0.76<br>1 <sup>st</sup> CDI and 2 <sup>nd</sup> CDI gestures: 0.80 |
|                                                |                                              | WS; 93                             | 1 <sup>st</sup> CDI and 2 <sup>nd</sup> CDI vocabulary: 0.89                                                                                                                                  |
| Australian English: Kalashnikova et al. (2016) | interval between CDIs: 6 months <sup>6</sup> | 1 <sup>st</sup> CDI at 12-30M; 66  | 1 <sup>st</sup> CDI and 2 <sup>nd</sup> general correlation: 0.43                                                                                                                             |
| <b>2b. Comparing CDI with other scales</b>     |                                              |                                    |                                                                                                                                                                                               |
| Finnish: Lyytinen et al. (1996, Table 3)       | RDLS                                         | CDI at 14M and RDLS at 18M; 94     | CDI vocabulary and RDLS expressive score: 0.60<br>CDI vocabulary and RDLS comprehension score: 0.20                                                                                           |
|                                                |                                              | 1 <sup>st</sup> CDI at 19M,        | 1 <sup>st</sup> CDI vocabulary and EVT: 0.50 (at 32M) & 0.46 (at 40M)                                                                                                                         |

| Validity studies                                  | Method                | Age range;<br>number of<br>participants                                                                                                                             | Correlations <sup>1</sup>                                                                                                                                                                                        |
|---------------------------------------------------|-----------------------|---------------------------------------------------------------------------------------------------------------------------------------------------------------------|------------------------------------------------------------------------------------------------------------------------------------------------------------------------------------------------------------------|
| New Zealand English: Reese & Read (2000, Table 2) | EVT                   | EVT at 32M and 40M; 59                                                                                                                                              | 1 <sup>st</sup> CDI Complexity and EVT: 0.32 (at 32M) & 0.38 (at 40M)<br>1 <sup>st</sup> CDI M3L and EVT: 0.39 (at 32M) & 0.47 (at 40M)                                                                          |
|                                                   |                       | 2 <sup>nd</sup> CDI at 25M, EVT at 32M and 40M; 59                                                                                                                  | 2 <sup>nd</sup> CDI vocabulary and EVT: 0.50 (at 32M) & 0.43 (at 40M)<br>2 <sup>nd</sup> CDI Complexity and EVT: 0.43 (at 32M) & 0.42 (at 40M)<br>2 <sup>nd</sup> CDI M3L and EVT: 0.47 (at 32M) & 0.46 (at 40M) |
|                                                   | PPVT                  | 1 <sup>st</sup> CDI at 19M, PPVT at 32M (form A) and 40M (form B); 59                                                                                               | 1 <sup>st</sup> CDI vocabulary and PPVT: 0.48 (at 32M & 40M)<br>1 <sup>st</sup> CDI Complexity and PPVT: 0.36 (at 32M) & 0.41 (at 40M)<br>1 <sup>st</sup> CDI M3L and PPVT: 0.27 (at 32M) & 0.44 (at 40M)        |
|                                                   |                       | 2 <sup>nd</sup> CDI at 24M, PPVT at 32M (form A) and 40M (form B); 59                                                                                               | 2 <sup>nd</sup> CDI vocabulary and PPVT: 0.44 (at 32M & 40M)<br>2 <sup>nd</sup> CDI Complexity and PPVT: 0.45 (at 32M) & 0.36 (at 40M)<br>2 <sup>nd</sup> CDI M3L and PPVT: 0.48 (at 32M) & 0.43 (at 40M)        |
| Swedish: Eriksson (2001, Table 6)                 | producing a narrative | CDI at 22 or 28M; 32<br><br>1 <sup>st</sup> narrative task at 36 or 42M; 27<br><br>2 <sup>nd</sup> narrative task at 48 and 54 M; 20<br>(15 on all three occasions) | CDI vocabulary score and number of word types: 0.377<br>CDI vocabulary score and MLU: 0.466<br>CDI M3L and number of word types: 0.578<br>CDI M3L and MLU: 0.630                                                 |

| Validity studies                                   | Method                    | Age range;<br>number of<br>participants                                          | Correlations <sup>1</sup>                                                                                                                                                                             |
|----------------------------------------------------|---------------------------|----------------------------------------------------------------------------------|-------------------------------------------------------------------------------------------------------------------------------------------------------------------------------------------------------|
| Irish: O’Toole & Fletcher (2010, Table 5, Table 6) | 15-min recorded session   | CDI at 16–21M and spontaneous language sample at 22–27M; 9                       | CDI vocabulary and number of transcribed words: 0.92<br>CDI M3L and MLU: 0.73<br>CDI Complexity and MLU: 0.73                                                                                         |
|                                                    |                           | CDI at 22–27M and spontaneous language sample at 28–33M; 7                       | CDI vocabulary and number of transcribed words: 0.86<br>CDI M3L and MLU: nonsignificant<br>CDI Complexity and MLU: nonsignificant                                                                     |
| Galician: Pérez Pereira & Resches (2011, Table 5)  | WPPSI-R                   | 1 <sup>st</sup> CDI at 18M and 2 <sup>nd</sup> CDI at 24M and WPPSI-R at 48M; 42 | 1 <sup>st</sup> CDI vocabulary and WPPSI verbal IQ: 0.42<br>2 <sup>nd</sup> CDI vocabulary and WPPSI verbal IQ: 0.38                                                                                  |
|                                                    | RDLS-III                  | 1 <sup>st</sup> CDI at 18M and 2 <sup>nd</sup> CDI at 24M and RDLS at 48M; 42    | 1 <sup>st</sup> CDI vocabulary and RDLS expressive score: 0.38<br>2 <sup>nd</sup> CDI vocabulary and RDLS expressive score: 0.58<br>2 <sup>nd</sup> CDI vocabulary and RDLS comprehension score: 0.52 |
| Estonian: Schults (2016)                           | recorded sessions at home | recording at 14M and CDI at 16M; 10                                              | CDI vocabulary and number of transcribed words: 0.66                                                                                                                                                  |
