# Supplementary material
Source: publisher figshare collection journal article supplement (https://asha.figshare.com/articles/dataset/_/22661689)
Supplement: Supplementary file 3 [file 1]

**Supplemental Material S2.** Test-retest reliability studies: number of participants, children's age, interval and the correlations between the 1st and 2nd session. The table is listed by the interval between 1st and 2nd sessions.

| Test–retest study                                        | Number of participants | Children’s age | Interval between the 1st and 2nd sessions | Test–retest reliability; correlations or percentage of agreements between the 1st and 2nd session                                                                         |
|----------------------------------------------------------|------------------------|----------------|-------------------------------------------|---------------------------------------------------------------------------------------------------------------------------------------------------------------------------|
| Kenyan (Alcock et al., 2015)                             | 17                     | WG             | 7 days                                    | C: 0.69<br>P: 0.54                                                                                                                                                        |
| German (Szagun et al., 2009; Table 10)                   | 57                     | WS             | 8–10 days                                 | P: 0.87*<br>Co: 0.94*                                                                                                                                                     |
| British (Alcock et al., 2020) <sup>1</sup>               | 31                     | 11–15M         | 3–15 days                                 | scores on each subscale between 1st and 2nd sessions did not differ significantly<br>relatively low correlations between 1st and 2nd session on production (no more info) |
| Canadian French (Trudeau et al., 2008, Table 2, Table 3) | 30                     | 8–10M          | 2–3 weeks                                 | C: 0.89<br>P: 0.79<br>G: 0.79                                                                                                                                             |
|                                                          | 29                     | 13–15M         |                                           | C: 0.91<br>P: 0.92<br>G: 0.93                                                                                                                                             |
|                                                          | 30                     | 19–21M         |                                           | P: 0.98<br>Co: 0.97                                                                                                                                                       |
|                                                          | 32                     | 26–28M         |                                           | P: 0.95<br>Co: 0.90                                                                                                                                                       |

| Test–retest study                                                     | Number of participants | Children’s age | Interval between the 1st and 2nd sessions | Test–retest reliability; correlations or percentage of agreements between the 1st and 2nd session |
|-----------------------------------------------------------------------|------------------------|----------------|-------------------------------------------|---------------------------------------------------------------------------------------------------|
| Peninsular Spanish (López Ornat et al., 2005, Table 4.45, Table 4.46) | 67                     | WG             | 2–3 weeks                                 | C: 0.98*<br>P: 0.99*<br>G: 0.94*                                                                  |
|                                                                       |                        | WS             |                                           | P: 0.99*<br>Co: 0.98*                                                                             |
| Mexican Spanish (Jackson-Maldonado et al., 1993, Table 6, Table 7)    | 16                     | WG             | 1 month                                   | C: 0.66*<br>P: 0.53*                                                                              |
|                                                                       | 20                     | WS             |                                           | P: 0.62*                                                                                          |
| Chinese Cantonese (Tardif & Fletcher, 2008, Table 4.6, Table 4.7)     | 48                     | WG             | 1 month                                   | C: 0.73*<br>P: 0.77*<br>G: 0.75*                                                                  |
|                                                                       | 94                     | WS             |                                           | P: 0.90*<br>Co: 0.87*                                                                             |
| Chinese Mandarin (Tardif & Fletcher, 2008, Table 4.6, Table 4.7)      | 90                     | WG             | 4–6 weeks                                 | C: 0.76*<br>P: 0.91*<br>G: 0.64*                                                                  |
|                                                                       | 150                    | WS             |                                           | P: 0.89*<br>Co: 0.86*                                                                             |
| Basque (García et al., 2008, Table 6)                                 | 20                     | WG             | 6 weeks                                   | C: 0.92<br>P: 0.83<br>G: 0.83                                                                     |

| Test–retest study                                   | Number of participants | Children’s age | Interval between the 1st and 2nd sessions | Test–retest reliability; correlations or percentage of agreements between the 1st and 2nd session |
|-----------------------------------------------------|------------------------|----------------|-------------------------------------------|---------------------------------------------------------------------------------------------------|
|                                                     | 28                     | WS             |                                           | P: 0.98<br>Co: 0.99                                                                               |
| Norwegian (Simonsen et al., 2014, Table 2, Table 3) | 329                    | WG             | Average 46 days                           | C: 0.62–0.95<br>P: 0.47–0.97<br>G: 0.39–0.95                                                      |
|                                                     | 397                    | WS             |                                           | P: 0.40–1.00                                                                                      |
| Polish (Smoczyńska et al., 2015)                    | 89                     | WG             | 45 days at maximum                        | C: 0.90<br>P: 0.85<br>G: 0.94                                                                     |
|                                                     | 64                     | WS             | 45 days at maximum                        | P: 0.97                                                                                           |
| Cypriot Greek (Taxitari et al., 2016)               | N/A                    | WS             | 1 month                                   | N/A                                                                                               |
| Estonian (Schults, 2016)                            | 10                     | 14M            | 2 months                                  | C: 0.74<br>P: 0.93                                                                                |
| Swedish (Berglund & Eriksson, 2000a, Table 5)       | 54                     | WG             | 2 months                                  | C: 82–93%<br>P: 59–77%<br>G: 91–97%                                                               |
|                                                     | 60                     | WS             | 3 months                                  | P: 86–94%<br>Co: 93–94%                                                                           |

*Note.* C = comprehended words; P = produced words; G = gestures; Co = section Complexity; \* = partial correlation.

<sup>1</sup> The test–retest was assessed also as interform reliability—the caregivers first completed the paper form and during the second session the online form or vice-versa.
